# Supplementary material for: Ablative fractional laser treatment reduces hedgehog pathway gene expression in murine basal cell carcinomas
Source: Springer Nature journal article supplement (doi:10.1007/s10103-024-03997-1), 2024-02-03
Supplement: MOESM1 [file 26696898]

## Supplementary Information

**Title:** Ablative Fractional Laser Treatment Reduces Hedgehog Pathway Gene Expression in Murine Basal Cell Carcinomas

*Authors:*

Kristian Kåber Pedersen<sup>a\*</sup> (0000-0002-9994-7848), Jonatan Riber Granborg<sup>a</sup> (0000-0002-5887-630X), Catharina Margrethe Lerche<sup>a b</sup> (0000-0003-3653-6424), Thomas Litman<sup>c d</sup> (0000-0002-6068-901X), Uffe Høgh Olesen<sup>a</sup> (0000-0002-4578-684X), Merete Hædersdal<sup>a</sup> (0000-0003-1250-2035)

<sup>a</sup>Department of Dermatology, Copenhagen University Hospital – Bispebjerg, 2400 Copenhagen, Denmark

<sup>b</sup>Department of Pharmacy, University of Copenhagen, 2100 Copenhagen, Denmark

<sup>c</sup>Department of Immunology and Microbiology, University of Copenhagen, 2200 Copenhagen, Denmark

<sup>d</sup>Molecular Biomedicine, LEO Pharma A/S, 2750 Ballerup, Denmark

\*Corresponding author, email: [kristian.kaaber.pedersen@regionh.dk](mailto:kristian.kaaber.pedersen@regionh.dk)

**Journal:** Lasers in Medical Science (LIMS)

**Supplementary Table 1** TaqMan qPCR probes used for the experiment

| Gene         | TaqMan Probe ID |
|--------------|-----------------|
| <i>Gli1</i>  | Mm00494654_m1   |
| <i>Gli2</i>  | Mm01293117_m1   |
| <i>Ptch1</i> | Mm00436026_m1   |
| <i>Rplp0</i> | Mm00725448_s1   |
| <i>Ppia</i>  | Mm02342430_g1   |
| <i>Rpl19</i> | Mm02601633_g1   |

The probes were bought from ThermoFisher (<https://www.thermofisher.com/dk/en/home/life-science/pcr/real-time-pcr/real-time-pcr-assays/tagman-gene-expression.html>)

Last accessed January 2, 2024
